# Supplementary material for: Atomic-level characterization of the oxygen storage material YBaCo4O7+δ synthesized at low temperature
Source: Royal Society of Chemistry journal article supplement (doi:10.1039/d2ta03952d), 2022-01-01
Supplement: d2ta03952d1.pdf [file d2ta03952d1.pdf]

## Supporting Information

### Atomic-Level Characterization of Oxygen Storage Material

### YBaCo<sub>4</sub>O<sub>7+δ</sub> Synthesized at Low Temperature

Hsin-Hui Huang,<sup>a\*</sup> Shunsuke Kobayashi,<sup>a\*</sup> Toyokazu Tanabe,<sup>b</sup> Kaihei Komiyama,<sup>c</sup>  
Miwa Saito,<sup>c</sup> Teruki Motohashi <sup>c</sup> and Akihide Kuwabara <sup>a</sup>

<sup>a</sup>Nanostructures Research Laboratory, Japan Fine Ceramics Center, 2-4-1 Mutsuno,  
Atsuta-ku, Nagoya, 456-8587, Japan

<sup>b</sup>Department of Materials Science and Engineering, National Defense Academy, 1-10-20,  
Hashirimizu, Yokosuka, Kanagawa 239-0811, Japan

<sup>c</sup>Department of Materials and Life Chemistry, Faculty of Engineering, Kanagawa  
University, Kanagawa 221-8686, Japan

\*Email: [hsin-hui\\_huang@jfcc.or.jp](mailto:hsin-hui_huang@jfcc.or.jp), [s\\_kobayashi@jfcc.or.jp](mailto:s_kobayashi@jfcc.or.jp)

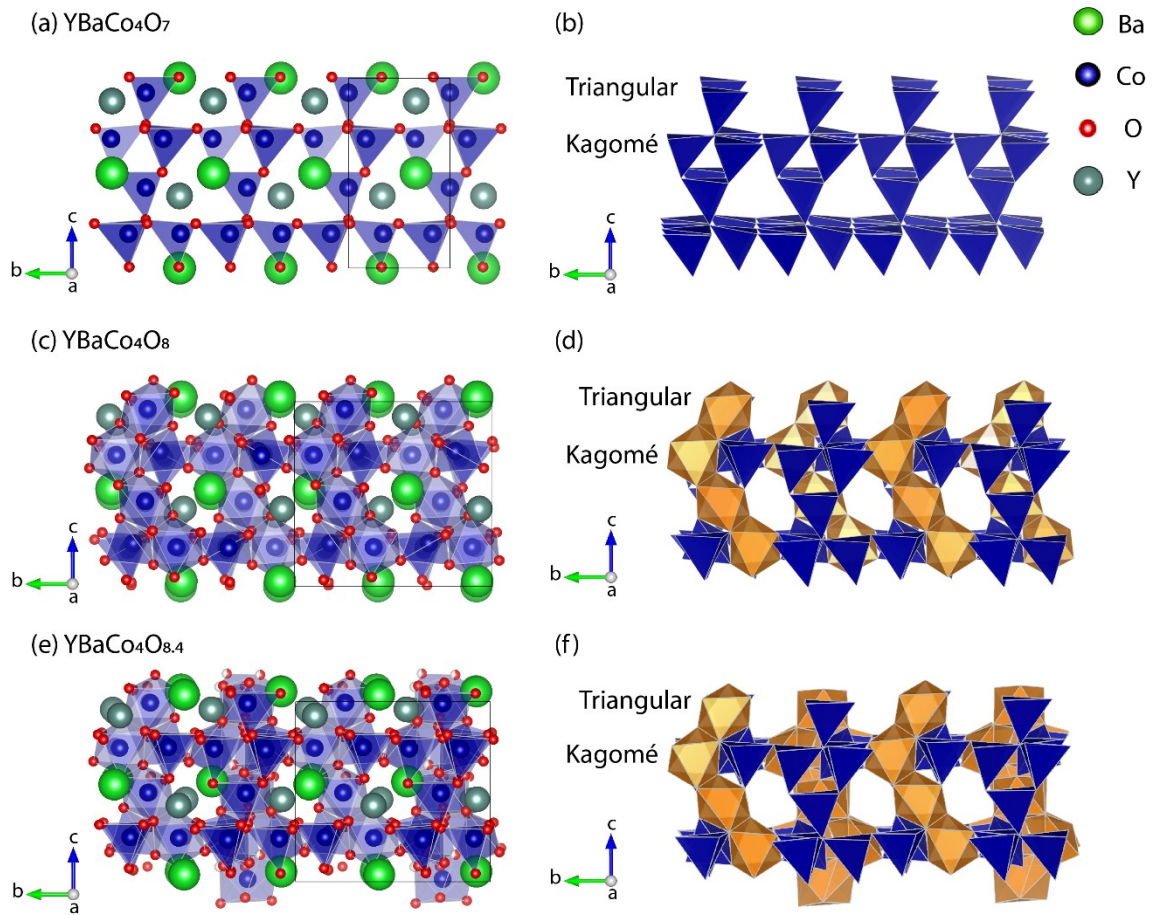

**Figure S1.** Schematic illustrations of the crystal structure of (a)  $\text{YBaCo}_4\text{O}_7$  and (b) local geometry of the triangular and Kagomé layers. The crystal structure of (c)(d) oxygenated  $\text{YBaCo}_4\text{O}_8$  and (e)(f) oxygenated  $\text{YBaCo}_4\text{O}_{8.4}$ . (d) and (f) show that the geometrical arrangement of  $\text{CoO}_4$  tetrahedra partially converted into  $\text{CoO}_6$  octahedra, as highlighted in orange. The difference between  $\text{YBaCo}_4\text{O}_8$  and  $\text{YBaCo}_4\text{O}_{8.4}$  is that more  $\text{CoO}_4$  tetrahedra are converted into  $\text{CoO}_6$  octahedra in the latter due to the larger amount of oxygen incorporated into the structure. The structural models of  $\text{YBaCo}_4\text{O}_7$ ,  $\text{YBaCo}_4\text{O}_8$ , and  $\text{YBaCo}_4\text{O}_{8.4}$  are adapted from references S1, S2, and S3, respectively. The illustrations were drawn by VESTA software.

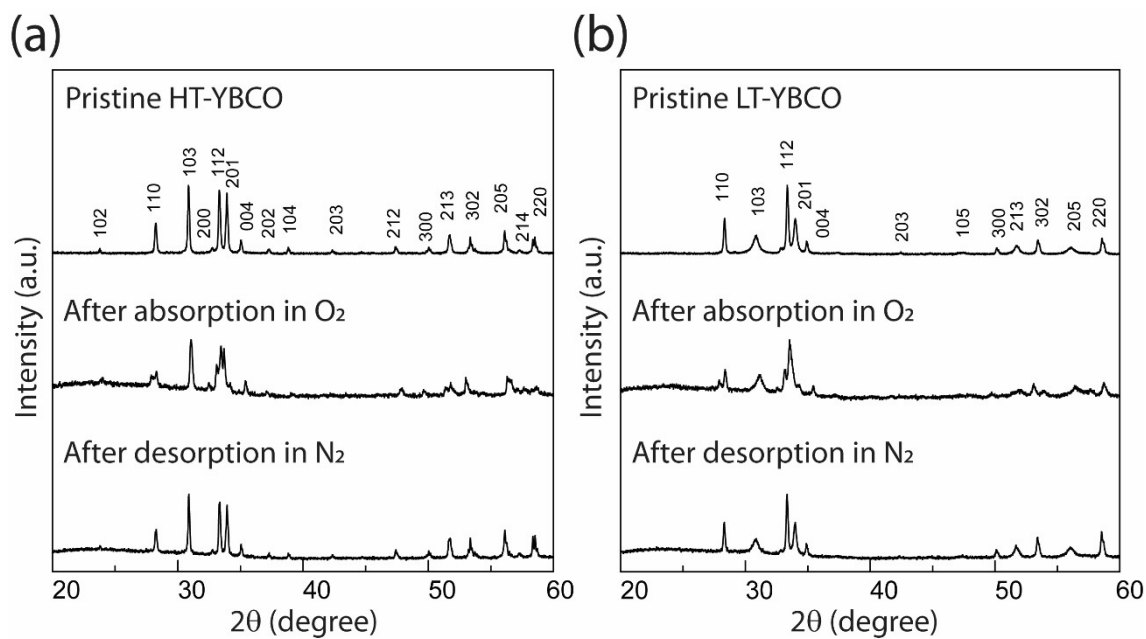

**Figure S2.** XRD patterns of (a) HT-YBCO and (b) LT-YBCO measured in the pristine state, after oxygen absorption, and oxygen desorption.

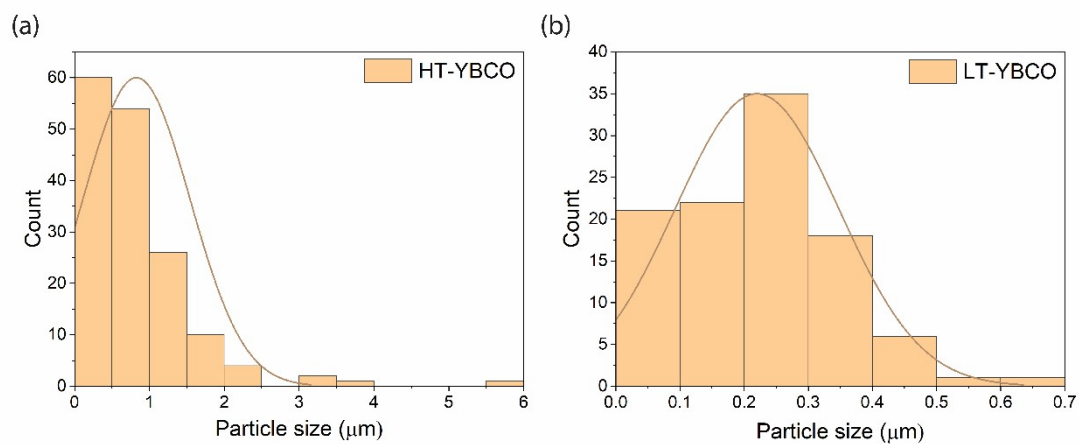

**Figure S3.** Histograms of the particle size distribution of pristine (a) HT-YBCO and (b) LT-YBCO.

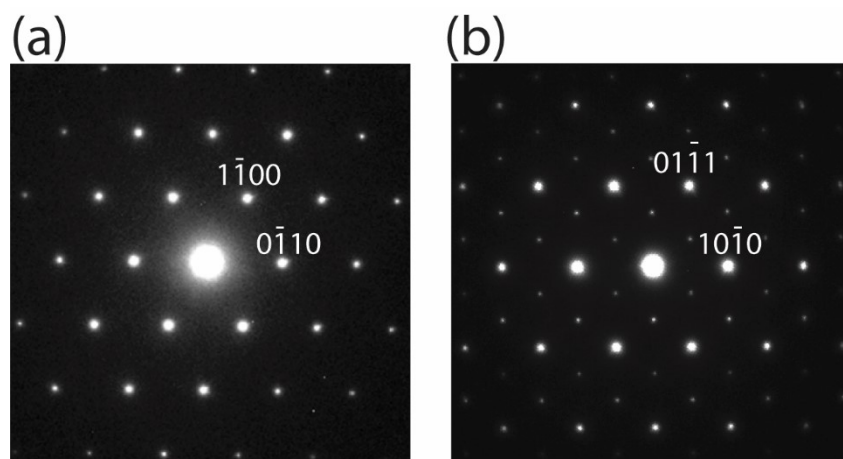

**Figure S4.** Electron diffraction patterns of pristine LT-YBCO viewed from the zone axes of (a)  $[0001]$  and (b)  $[1213]$  directions.

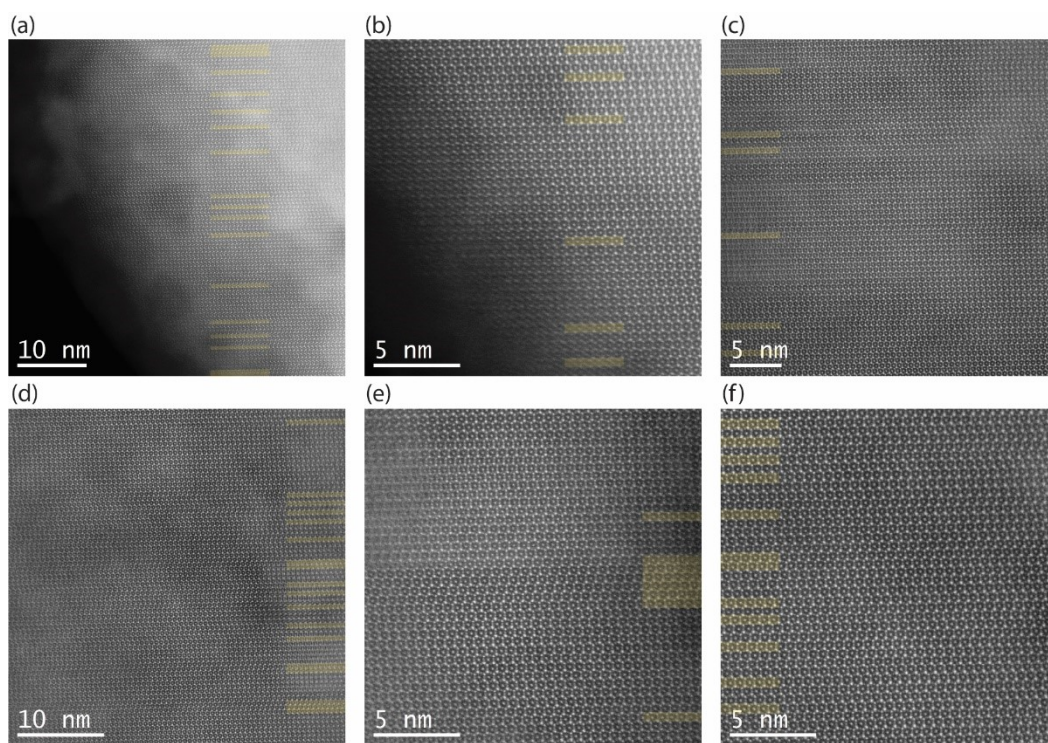

**Figure S5.** (a-f) HAADF-STEM images of pristine LT-YBCO taken in different regions. The stacking faults are highlighted in yellow.

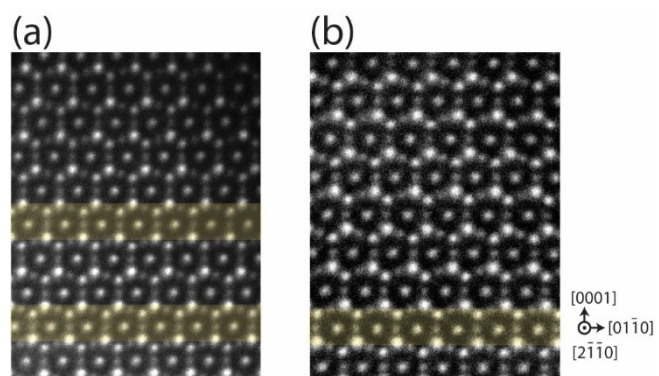

**Figure S6.** HAADF-STEM images of LT-YBCO after (a) oxygen absorption and (b) oxygen desorption. Stacking faults are indicated by yellow highlights.

### Acquisition-time dependence

For the acquisition-time dependence, an area of approximately  $100 \times 100 \text{ nm}^2$  was selected on an annular dark-field image to obtain EELS data. Energy dispersion of 0.3 eV per channel was used to acquire the carbon K-edge. The total acquisition time was 42 s and the exposure time was 0.1 s per pixel.

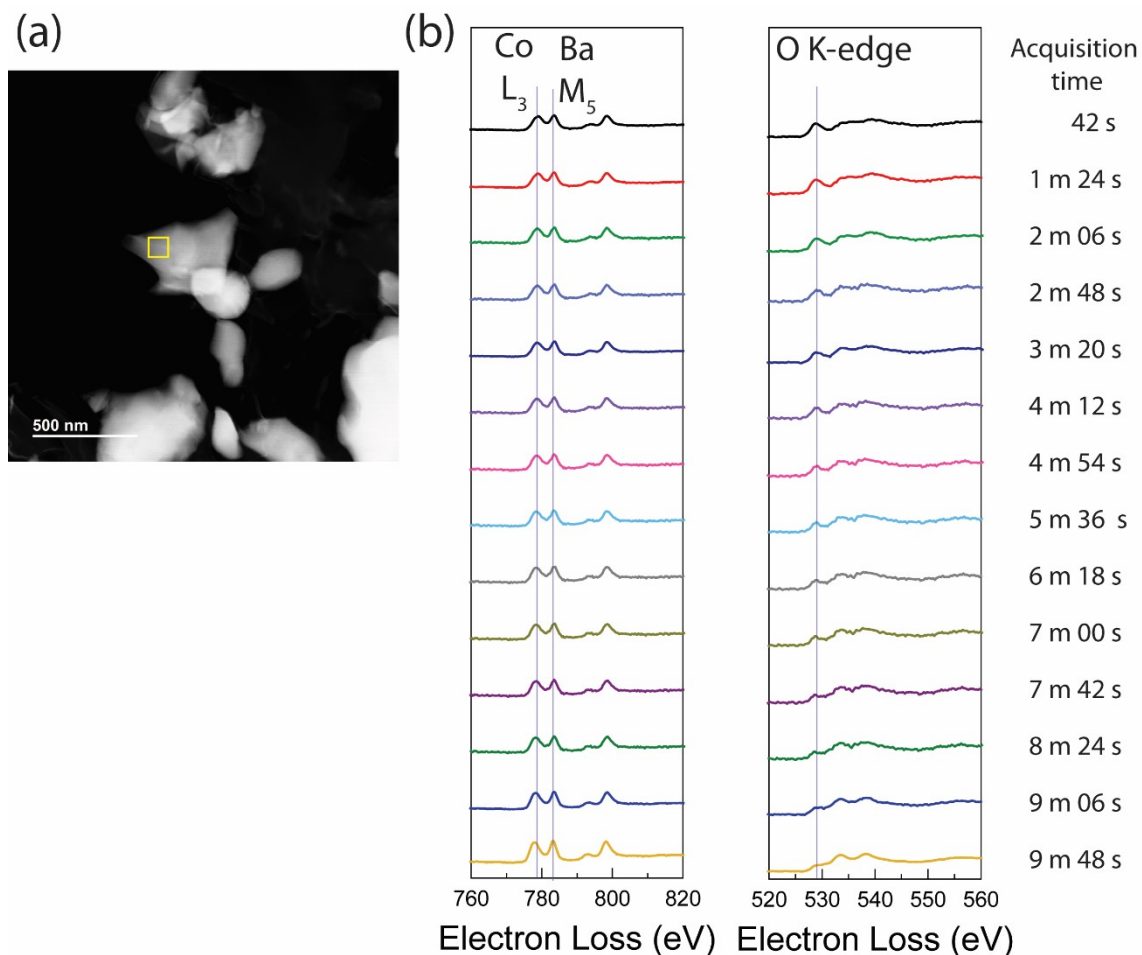

**Figure S7.** (a) HAADF-STEM image of the oxygenated LT-YBCO. (b) EEL spectra of the Co L, Ba M, and O K edges taken from the yellow rectangle area in (a) at acquisition time from short to long under the same condition. A peak shift of the Co L edge was found after an acquisition time of 5 min 36 s, indicating the reduction of cobalt upon oxygen release from the crystal lattice. Further exposure to electrons results in a diminishment of the onset (at 528.9 eV) in the O K edge, implying a full release of the absorbed oxygen.



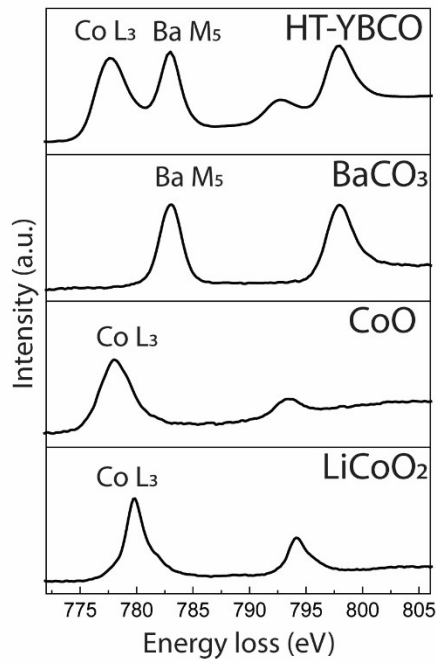

**Figure S8.** EEL spectra of the Co L and Ba M edges for the pristine HT-YBCO, BaCO<sub>3</sub>, CoO, and LiCoO<sub>2</sub>.

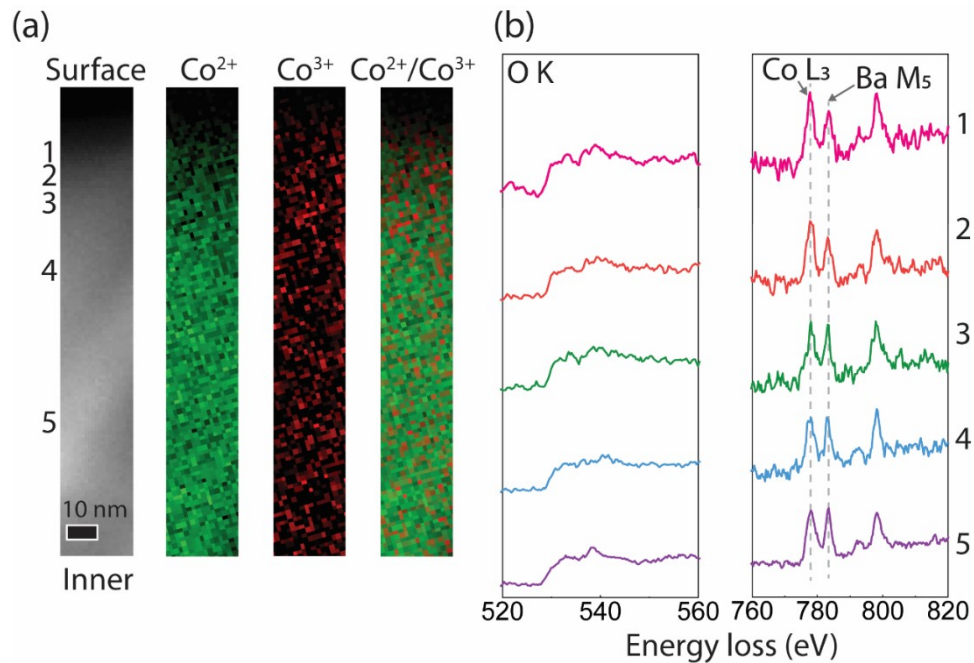

**Figure S9.** (a) ADF image of the pristine HT-YBCO particle near the surface and the corresponding MLLS fitting maps of Co<sup>2+</sup>, Co<sup>3+</sup>, and Co<sup>2+</sup>/Co<sup>3+</sup>, based on the references of CoO (Co<sup>2+</sup>), LiCoO<sub>2</sub> (Co<sup>3+</sup>) and BaCO<sub>3</sub> (Ba<sup>2+</sup>). (b) EEL spectra of the O K, Co L<sub>2,3</sub> and Ba M<sub>4,5</sub> edges extracted from the horizontal lines 1 to 5 on the ADF image.

### Surface state examinations of oxygenated HT-YBCO and LT-YBCO

The phase maps of  $\text{Co}^{2+}$ ,  $\text{Co}^{3+}$ , and  $\text{Co}^{2+}/\text{Co}^{3+}$  overlap of oxygenated HT-YBCO and LT-YBCO were extracted and shown in Fig. S10a and S11a, respectively. The EEL spectra of Co  $L_{2,3}$ , Ba  $M_{4,5}$ , and O K edges obtained from the horizontal lines 1 (near the surface) to 5 (inner structure) labeled in ADF images are shown in Fig. S10b and S11b. It was found that oxygenated HT-YBCO and LT-YBCO show almost no shift in the peak position of Co L edge from the inner structure to near the surface of the particles. Furthermore, the measured peak position of Co  $L_3$  edges of oxygenated HT-YBCO (778.8 eV) and oxygenated LT-YBCO (778.6 eV) are consistent with the values measured from the oxygenated YBCO at the inner structures (778.9 eV in HT-YBCO and 778.7 eV in LT-YBCO). It confirms that the entire particles of both oxygenated HT-YBCO and LT-YBCO are fully oxidized to their equilibrium states. In addition to that, it implies that the pathway of oxygen absorption is not disturbed by the surface effects in LT-YBCO.

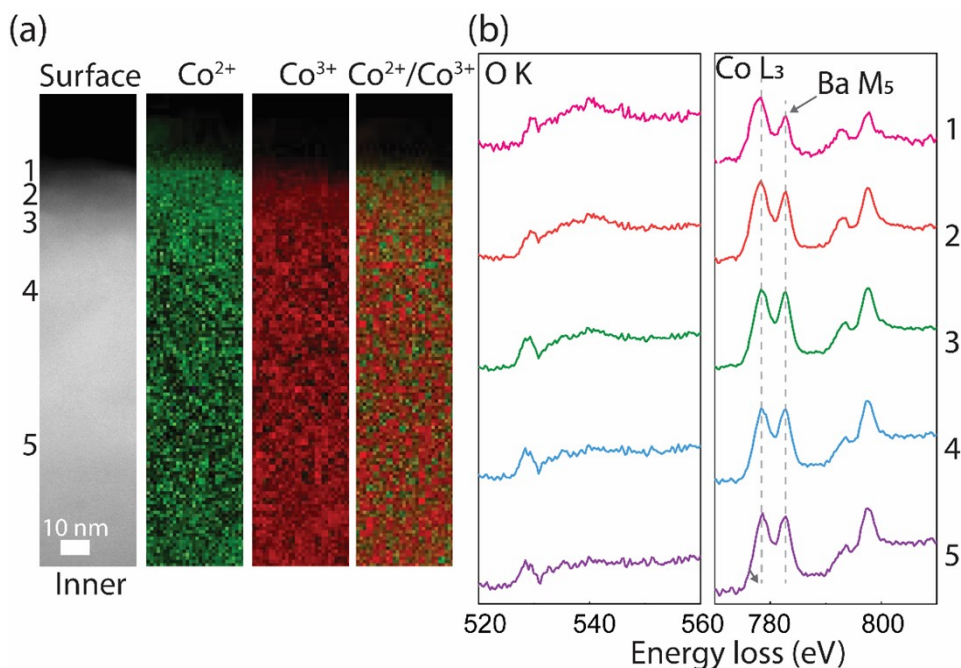

**Figure S10.** (a) ADF image of the oxygenated HT-YBCO particle near the surface and the corresponding  $\text{Co}^{2+}$ ,  $\text{Co}^{3+}$ , and  $\text{Co}^{2+}/\text{Co}^{3+}$  maps using MLLS fitting approach with the reference spectra obtained from CoO ( $\text{Co}^{2+}$ ),  $\text{LiCoO}_2$  ( $\text{Co}^{3+}$ ) and  $\text{BaCO}_3$  ( $\text{Ba}^{2+}$ ). (b) EEL spectra of the O K, Co  $L_{2,3}$  and Ba  $M_{4,5}$  edges extracted from the horizontal lines 1 to 5 on the ADF image.



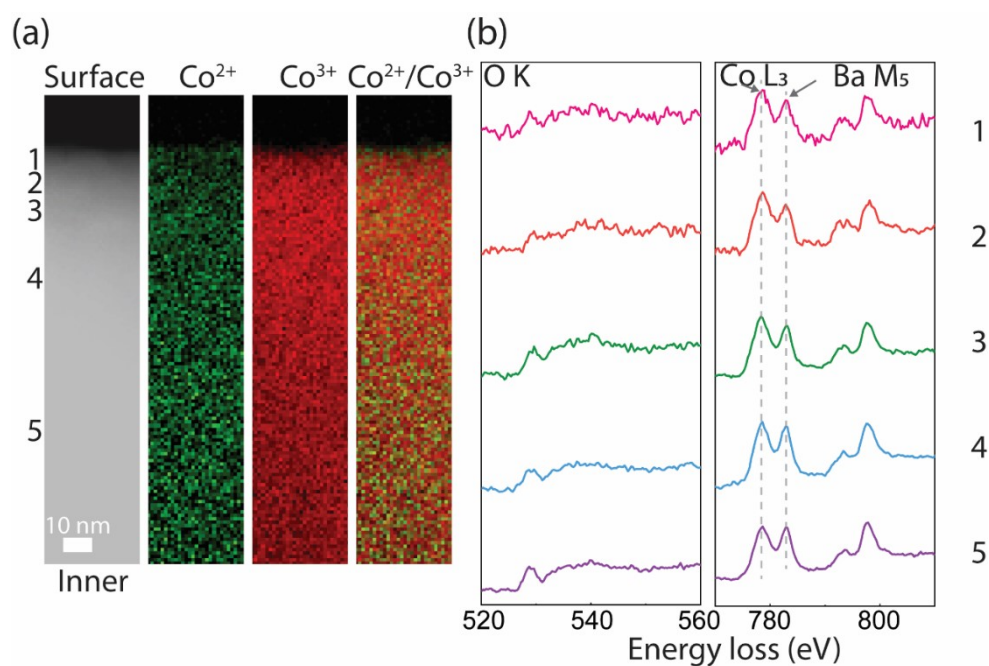

**Figure S11.** (a) ADF image of the oxygenated LT-YBCO particle near the surface and the corresponding MLLS fitting maps of  $\text{Co}^{2+}$ ,  $\text{Co}^{3+}$ , and  $\text{Co}^{2+}/\text{Co}^{3+}$ , based on the references of  $\text{CoO}$  ( $\text{Co}^{2+}$ ),  $\text{LiCoO}_2$  ( $\text{Co}^{3+}$ ) and  $\text{BaCO}_3$  ( $\text{Ba}^{2+}$ ). (b) EEL spectra of the O K, Co  $L_{2,3}$ , and Ba  $M_{4,5}$  edges extracted from the horizontal lines 1 to 5 on the ADF image.

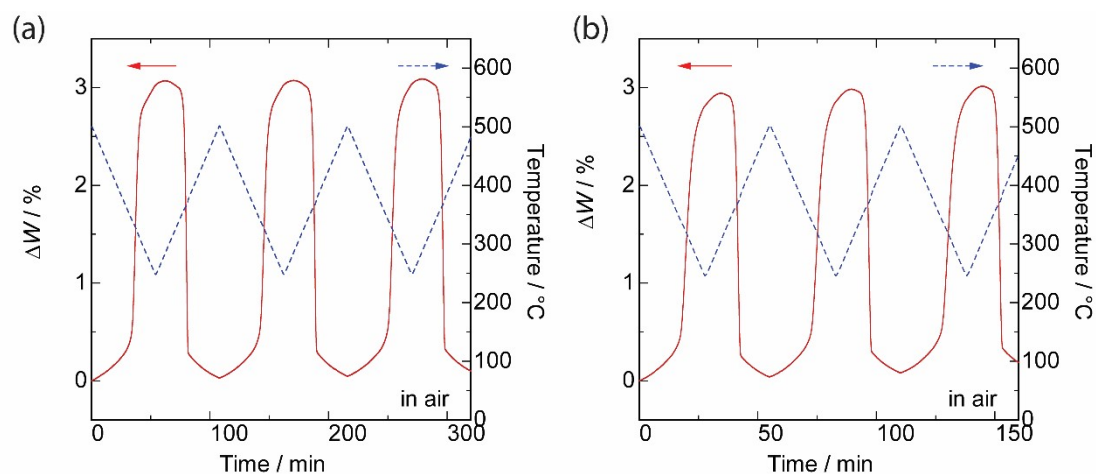

**Figure S12.** TG curves for HT-YBCO in flowing synthetic air upon temperature swing between 250 °C and 500 °C under heating/cooling rates of (a) 5 K/min and (b) 10 K/min. The sample temperature is also shown with a dotted curve.

## References

- S1. T. Komiyama, T. Motohashi, Y. Masubuchi, S. Kikkawa, Synthesis, *Materials Research Bulletin* 2010, **45**, 1527-1532.
- S2. O. Chmaissem, H. Zheng, A. Huq, P.W. Stephens, J.F. Mitchell, *Journal of Solid State Chemistry* 2008, **181**, 664-672.
- S3 N.V. Podberezskaya, N.B. Bolotina, V.Yu. Komarov, M.Yu. Kameneva, L.P. Kozeeva, A.N. Lavrov, A.I. Smolentsev, *Crystallography Reports* 2015, **60**, 484-492.
